# Supplementary material for: Fallen-leaf-sensitized biosolar oxygenation of hydrocarbons
Source: Royal Society of Chemistry journal article supplement (doi:10.1039/d5gc04630k), 2026-01-01
Supplement: d5gc04630k1.pdf [file d5gc04630k1.pdf]

Supplementary Information

**Fallen leaf-Sensitized Biosolar Oxygenation of  
Hydrocarbons**

Minkyung Lee <sup>a†</sup>, Jinha Jang <sup>a†</sup>, Jeongeun Cha <sup>b</sup>, Sang Hyun Lee <sup>b</sup>, Frank Hollmann <sup>c</sup>,  
Keehoon Won <sup>d\*</sup>, and Chan Beum Park <sup>a\*</sup>

<sup>a</sup> Department of Materials Science and Engineering, Korea Advanced Institute of Science  
and Technology (KAIST), 335 Science Road, Daejeon 34141, Republic of Korea

<sup>b</sup> Department of Biological Engineering, Konkuk University, 120 Neungdong-ro, Gwangjin-  
gu, Seoul 05029, Republic of Korea

<sup>c</sup> Department of Biotechnology, Delft University of Technology, Van der Maasweg 9, 2629  
HZ Delft, Netherlands.

<sup>d</sup> Department of Chemical and Biochemical Engineering, Dongguk University-Seoul, 30  
Pildong-ro 1-gil, Jung-gu, Seoul 04620, Republic of Korea

\*Corresponding authors. E-mail: keecheon@dongguk.edu; parkcb@kaist.ac.kr

## Table of Contents

### Supplementary Figures

- Fig S1.** Photographs of kraft lignin and lignocellulosic wastes
- Fig S2.** FT-IR spectra of lignocellulosic wastes
- Fig S3.** Characterization of the fallen Platanus leaves
- Fig S4.** External quantum efficiency (EQE) of the fallen Platanus leaves and kraft lignin
- Fig S5.** XPS C 1s and O 1s spectra of Platanus leaves before (0 h) and after 1 h and 2 h of photochemical reaction
- Fig S6.** Long-term stability and reusability test of the fallen Platanus leaves
- Fig S7.** Time-resolved spectroscopic analysis of kraft lignin and the fallen Platanus leaves
- Fig S8.** Cyclic voltammetry of the fallen Platanus leaves and kraft lignin
- Fig S9.** Transient photocurrent responses of defoliated photocatalysts
- Fig S10.** Temperature-programmed desorption (TPD) analysis
- Fig S11.** Dissolution processes of the fallen Platanus leaves followed by reassembly process
- Fig S12.** FTIR spectroscopic images and corresponding intensity images
- Fig S13.** Characterization of the fallen Platanus leaves before and after reassembly process
- Fig S14.** Comparison of untreated Platanus leaves and hydrochar
- Fig S15.** Photophysical properties of the fallen Platanus leaves
- Fig S16.** Effect of hydroxyl radical scavenger on  $\text{H}_2\text{O}_2$  generation of Platanus leaves photocatalytic system
- Fig S17.** Identification of hydroxyl radical formation and reaction pathways in the Platanus-driven
- Fig S18.** Effect of cosolvent on the rate of  $\text{H}_2\text{O}_2$  production
- Fig S19.**  $\text{H}_2\text{O}_2$  production from kraft lignin and lignocellulosic wastes (5 mg/mL) under visible light
- Fig S20.** Kinetics of photocatalyst/*Aae*UPO hybrid's photoenzymatic hydroxylation reaction
- Fig S21.** Photoenzymatic systems for ethylbenzene hydroxylation
- Fig S22.** Effect of enzyme loading on the concentration of (R)-1-phenylethanol production
- Fig S23.** Comparison of  $\text{TTN}_{Aae\text{UPO}}$  and  $\text{TOF}_{Aae\text{UPO}}$  values for photoenzymatic ethylbenzene hydroxylation

### Supplementary Tables

- Table S1:** Compositional analysis of lignocellulosic wastes
- Table S2:** Gas chromatography conditions for quantification of analytes

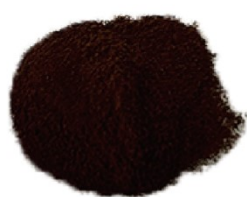

**Kraft lignin**

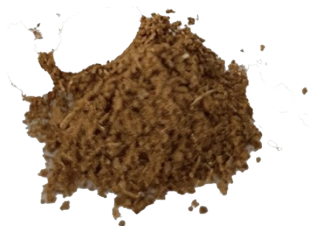

**Platanus leaves**

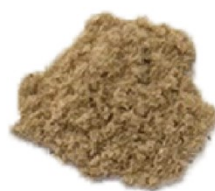

**Waste wood**

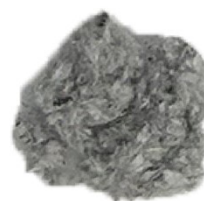

**Wastepaper**

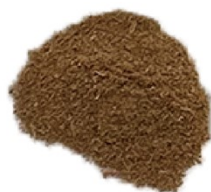

**Pin oak leaves**

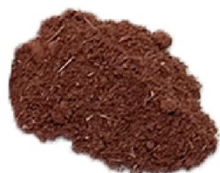

**Red maple leaves**

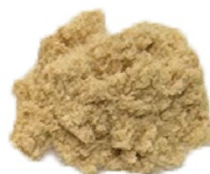

**Softwood**

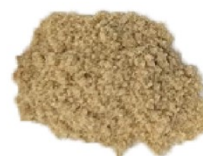

**Hardwood**

**Fig S1. Photographs of kraft lignin and lignocellulosic wastes** Photographs of kraft lignin and lignocellulosic waste powders (fallen Platanus leaves, waste wood, wastepaper, fallen pin oak leaves, fallen red maple leaves, softwood, and hardwood). Photo credit: Minkyung Lee, Korea Advanced Institute of Science and Technology.

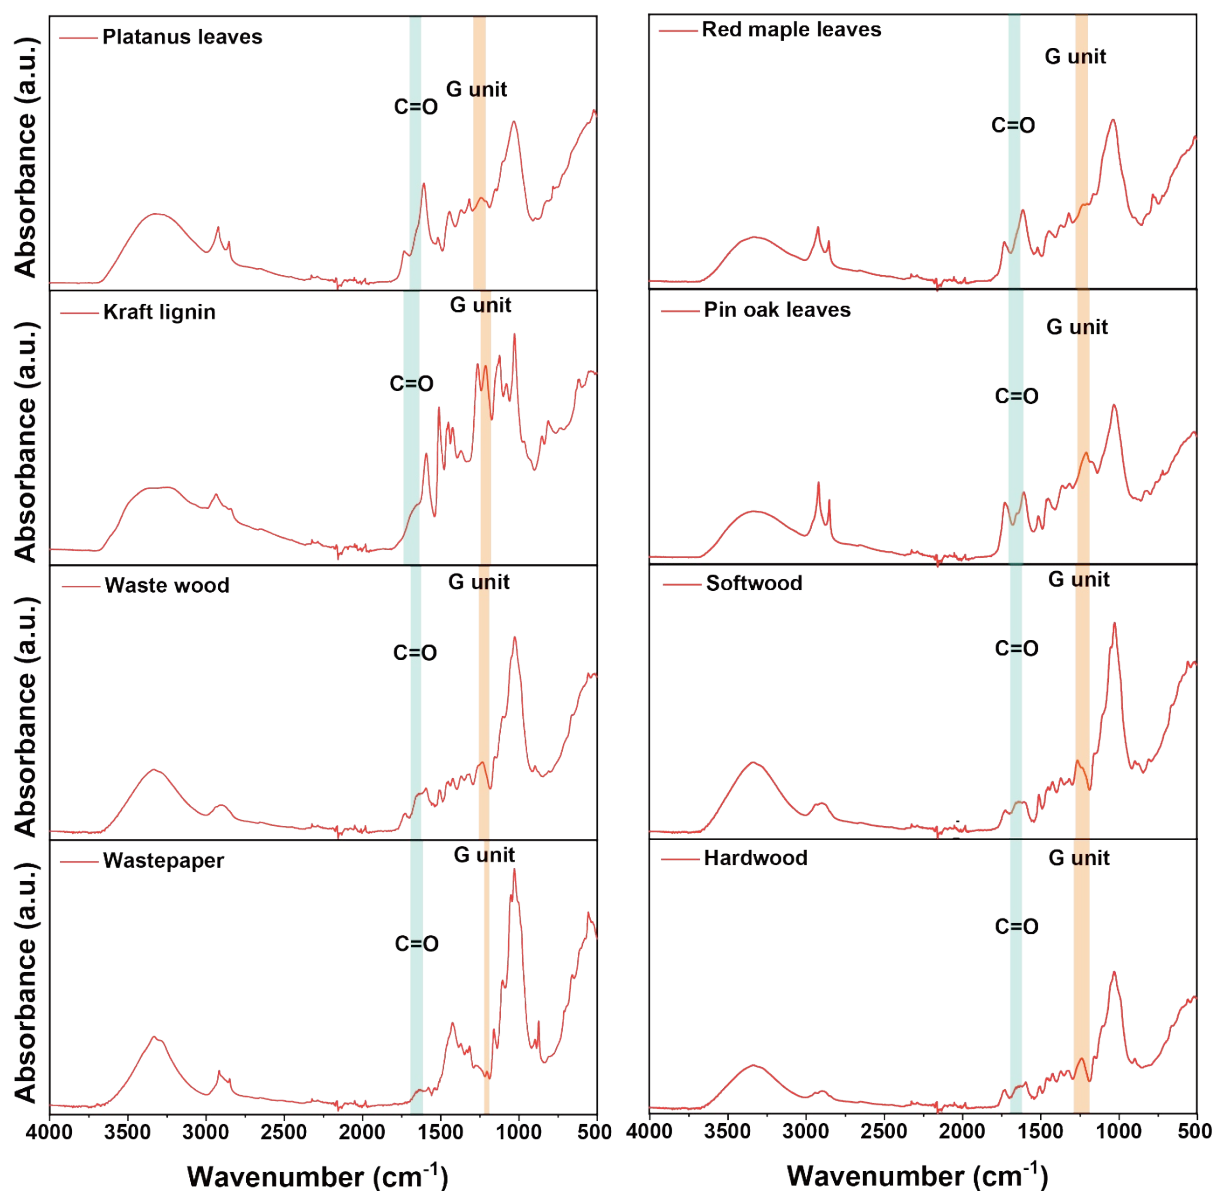

**Fig S2. FT-IR spectra of lignocellulosic wastes** FT-IR spectra of fallen Platanus leaves, kraft lignin, waste wood, wastepaper, fallen red maple leaves, fallen pin oak leaves, softwood, and hardwood in the region of 500–4000  $\text{cm}^{-1}$ .

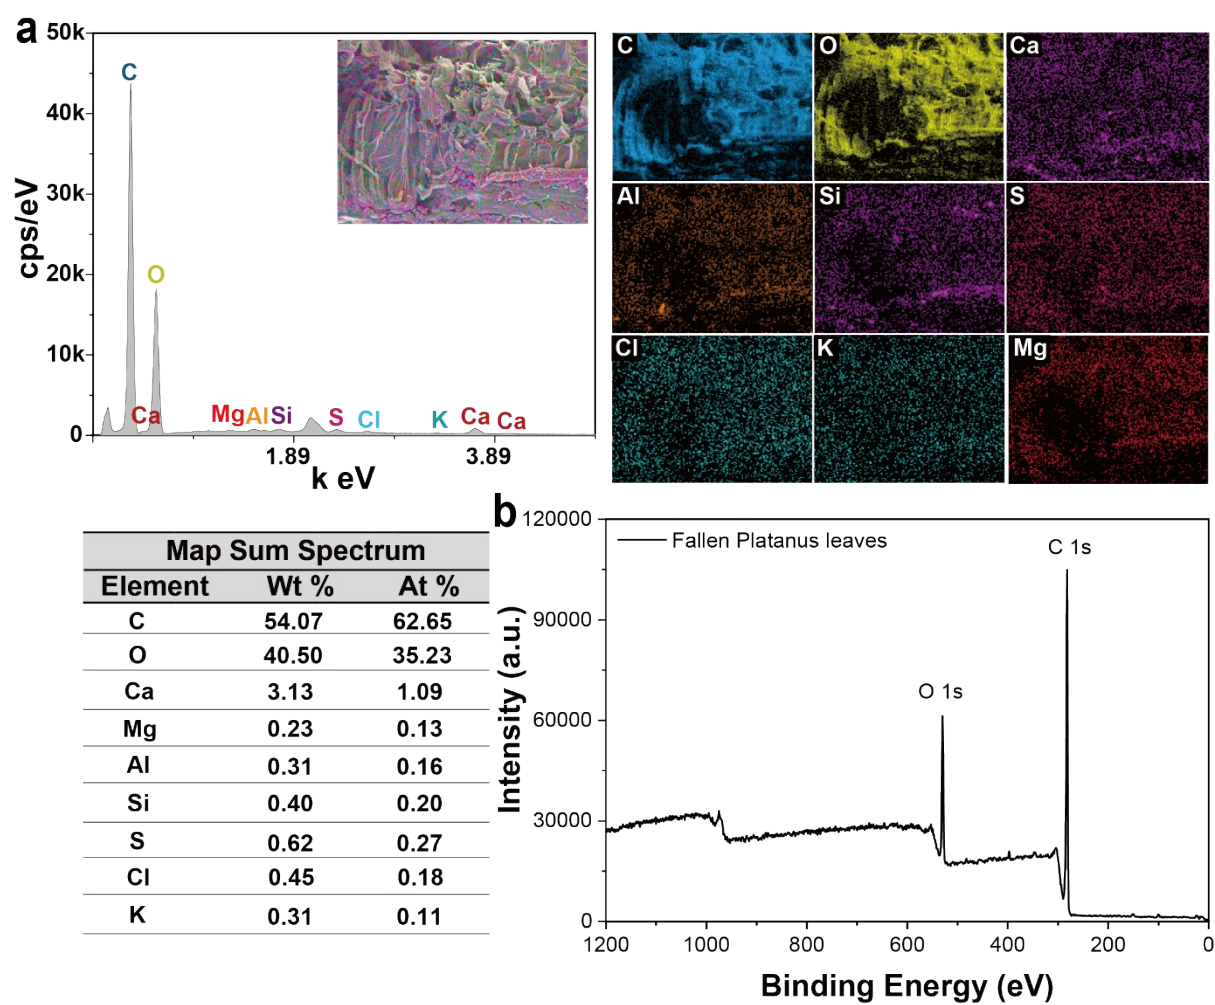

**Fig S3. Characterization of the fallen *Platanus* leaves** a, SEM-EDS spectrum, images, and elemental compositional table b, XPS spectrum

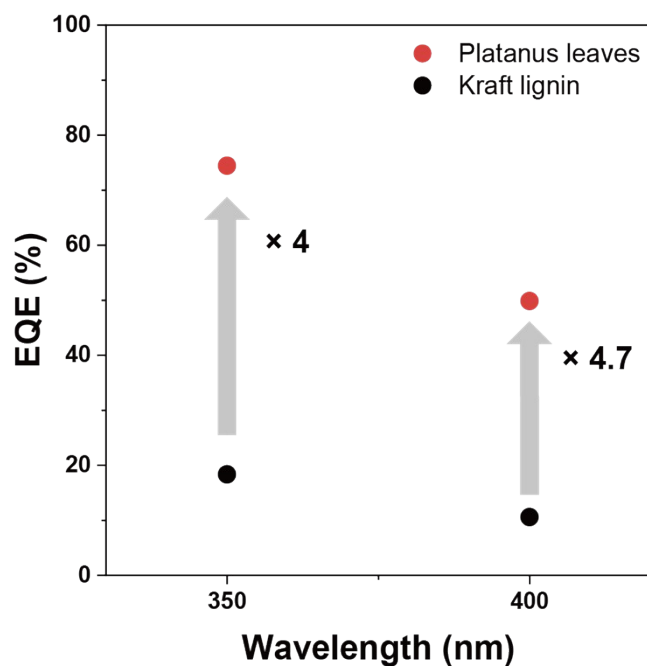

**Fig S4. External quantum efficiency (EQE) of the fallen Platanus leaves and kraft lignin**

External quantum efficiency (EQE) of  $\text{H}_2\text{O}_2$  production under monochromator-selected illumination (350 and 400 nm; illuminated area  $4.24 \text{ cm}^2$ ; irradiance  $10 \text{ mW cm}^{-2}$ ; 30 min) for  $1 \text{ mg mL}^{-1}$  of the fallen Platanus leaves and kraft lignin.

$$(6) \text{ External Quantum Efficiency (EQE)} = 2 \frac{n_{\text{H}_2\text{O}_2}}{n_{\text{photon}}} \times 100 (\%)$$

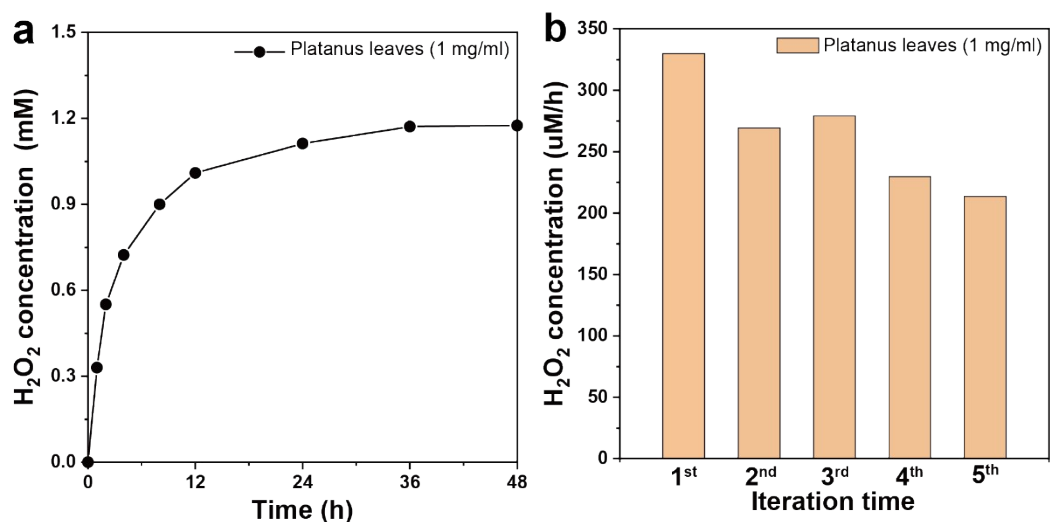

**Fig S5. Long-term stability and reusability test of the fallen Platanus leaves** (a) Time profiles of  $H_2O_2$  production by the fallen Platanus leaves (1 mg/mL) in a KPi buffer (100 mM, pH=7) under  $O_2$ /light for 48 h (b) Reusability test of fallen Platanus leaves (1 mg/mL) for  $H_2O_2$  production in 100 mM KPi buffer (pH 7) under  $O_2$  and visible light irradiation for 1 h. After each cycle, the leaves were washed with water before reusing.

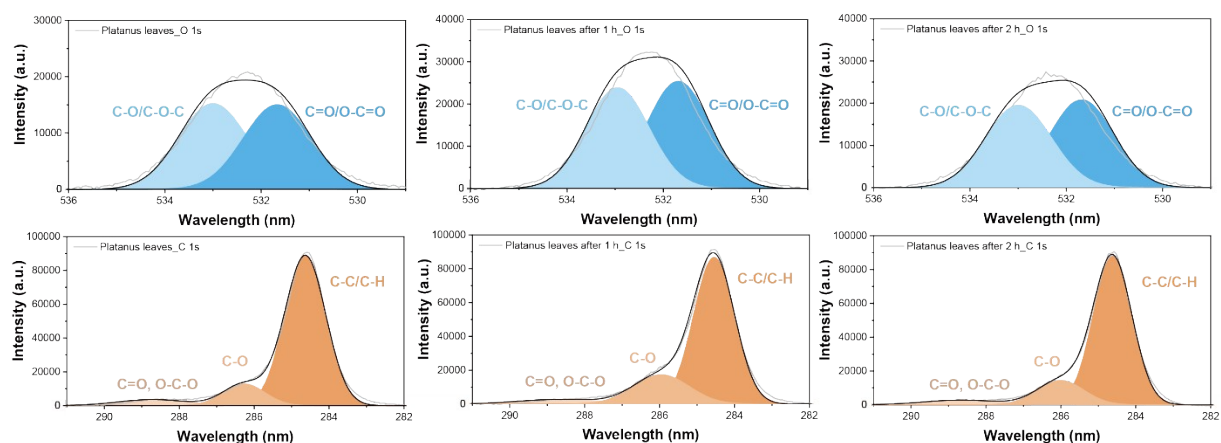

**Fig S6. XPS C 1s and O 1s spectra of Platanus leaves before (0 h) and after 1 h and 2 h of photochemical reaction**

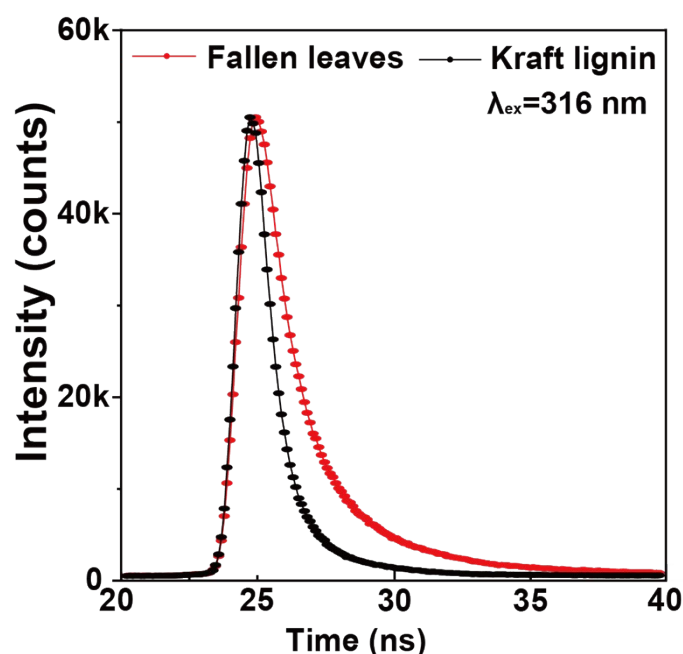

**Fig S7. Time-resolved spectroscopic analysis of kraft lignin and the fallen Platanus leaves.** Time-resolved fluorescence decay profiles of the fallen Platanus leaves (red) and kraft lignin (black) at excitation wavelength = 316 nm in a KPi (100 mM, pH=7). Powder concentration: 0.1 mg/mL. These decay profiles were fitted to a quadruple-exponential function: the fallen Platanus leaves:  $\tau_1 = 1.4$  ns,  $\tau_2 = 3.4$  ns, and  $\tau_3 = 9.6$  ns,  $\tau_4 = 0.6$  ns with average fluorescence lifetime = 1.5 ns; kraft lignin:  $\tau_1 = 0.5$  ns,  $\tau_2 = 1.7$  ns, and  $\tau_3 = 5.4$  ns,  $\tau_4 = 0.4$  ns with average fluorescence lifetime = 0.5 ns.



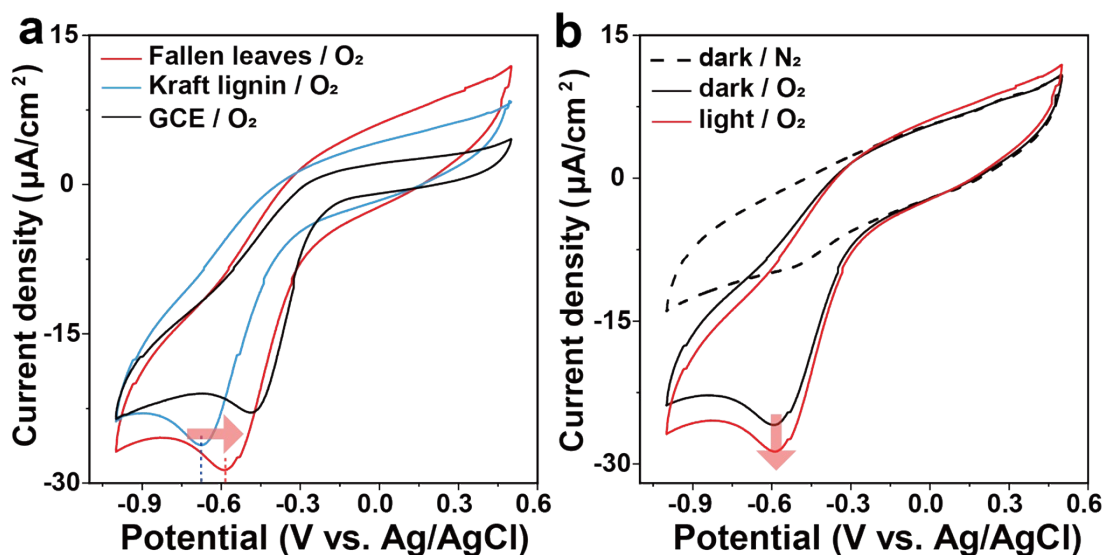

**Fig S8. Cyclic voltammetry of the fallen Platanus leaves and kraft lignin** (a) Cyclic voltammograms of glassy carbon electrode (black), kraft lignin (blue), the fallen Platanus leaves (red) in an  $O_2$ -saturated KPi buffer (100 mM, pH=7) under light ( $260\text{ nm} < \lambda < 900\text{ nm}$ ,  $I = 100\text{ mW/cm}^2$ ). (b) Cyclic voltammograms of the fallen Platanus leaves under dark/ $N_2$  (black, dotted), dark/ $O_2$  (black, solid), and light/ $O_2$  (red) in a KPi buffer (100 mM, pH=7). Scan rate: 50 mV/s; the number of cycles: 3.

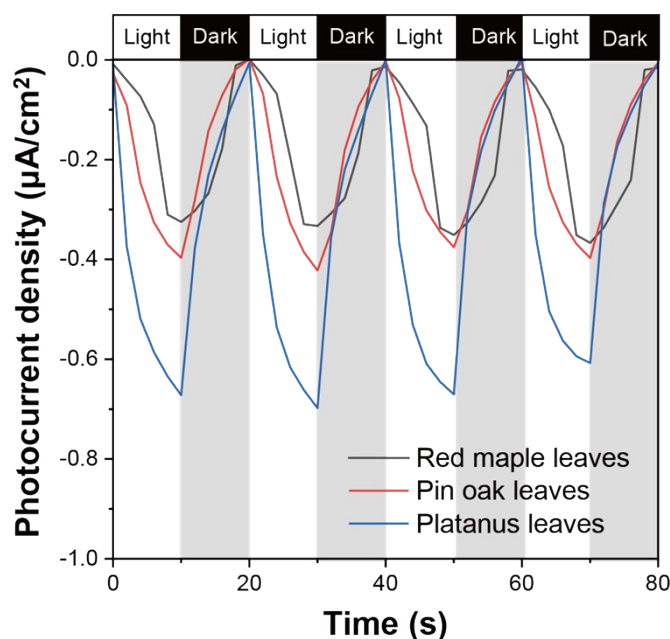

**Fig S9. Transient photocurrent responses of defoliated leaves.** Chopped CA at  $-0.6\text{ V}$  vs Ag/AgCl under intermittent light irradiation of Platanus leaves (blue), red maple leaves (black), and pin oak leaves (red).

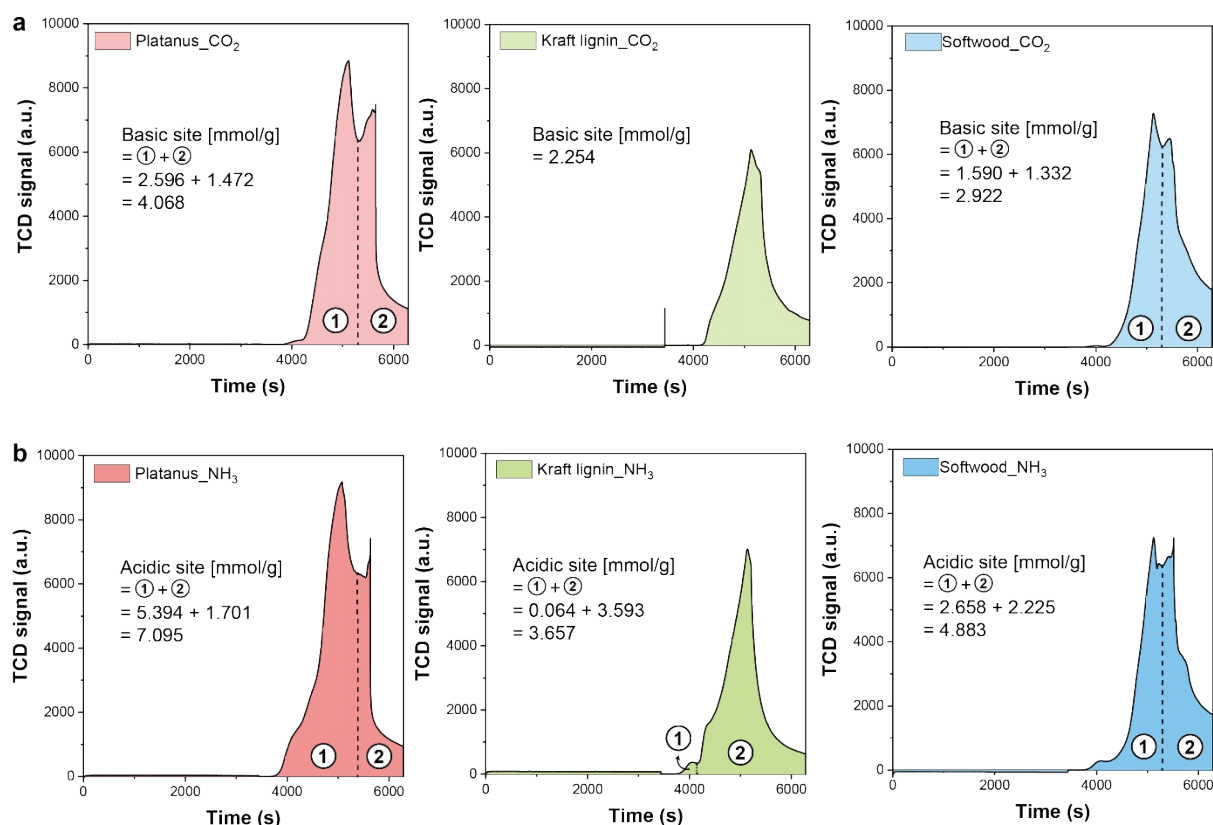

**Fig S10. Temperature-programmed desorption (TPD) analysis.** (a) CO<sub>2</sub>-TPD (b) NH<sub>3</sub>-TPD of Platanus leaves, kraft lignin, and softwood.

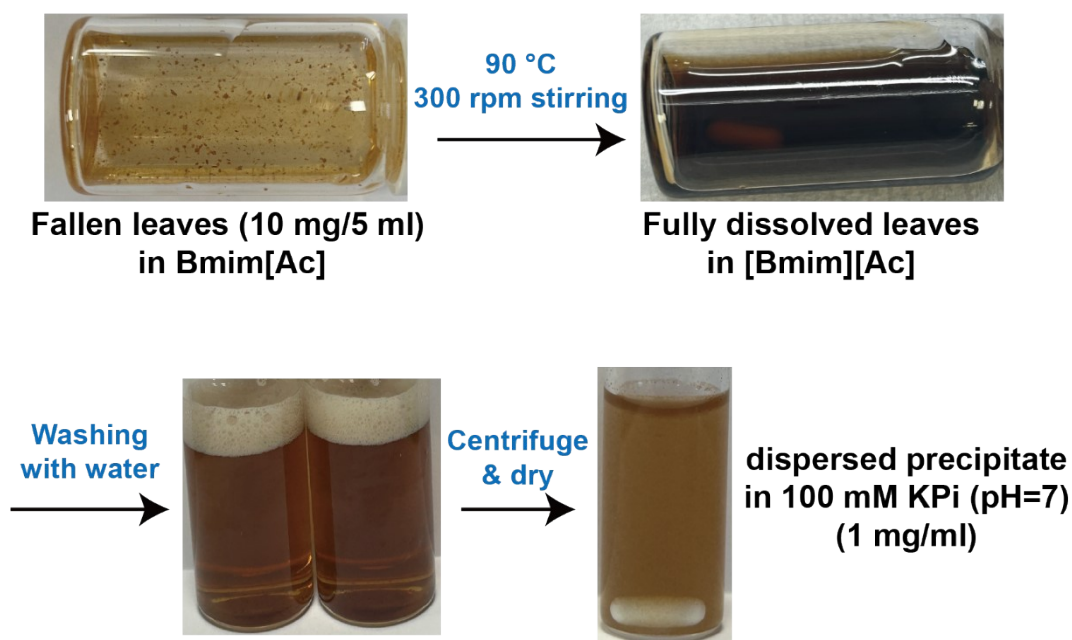

**Fig S11. Dissolution processes of the fallen Platanus leaves followed by reassembly process** Photographs of the dissolution and reassembly processes in ionic liquid ([Bmim][Ac]) of the fallen Platanus leaves.

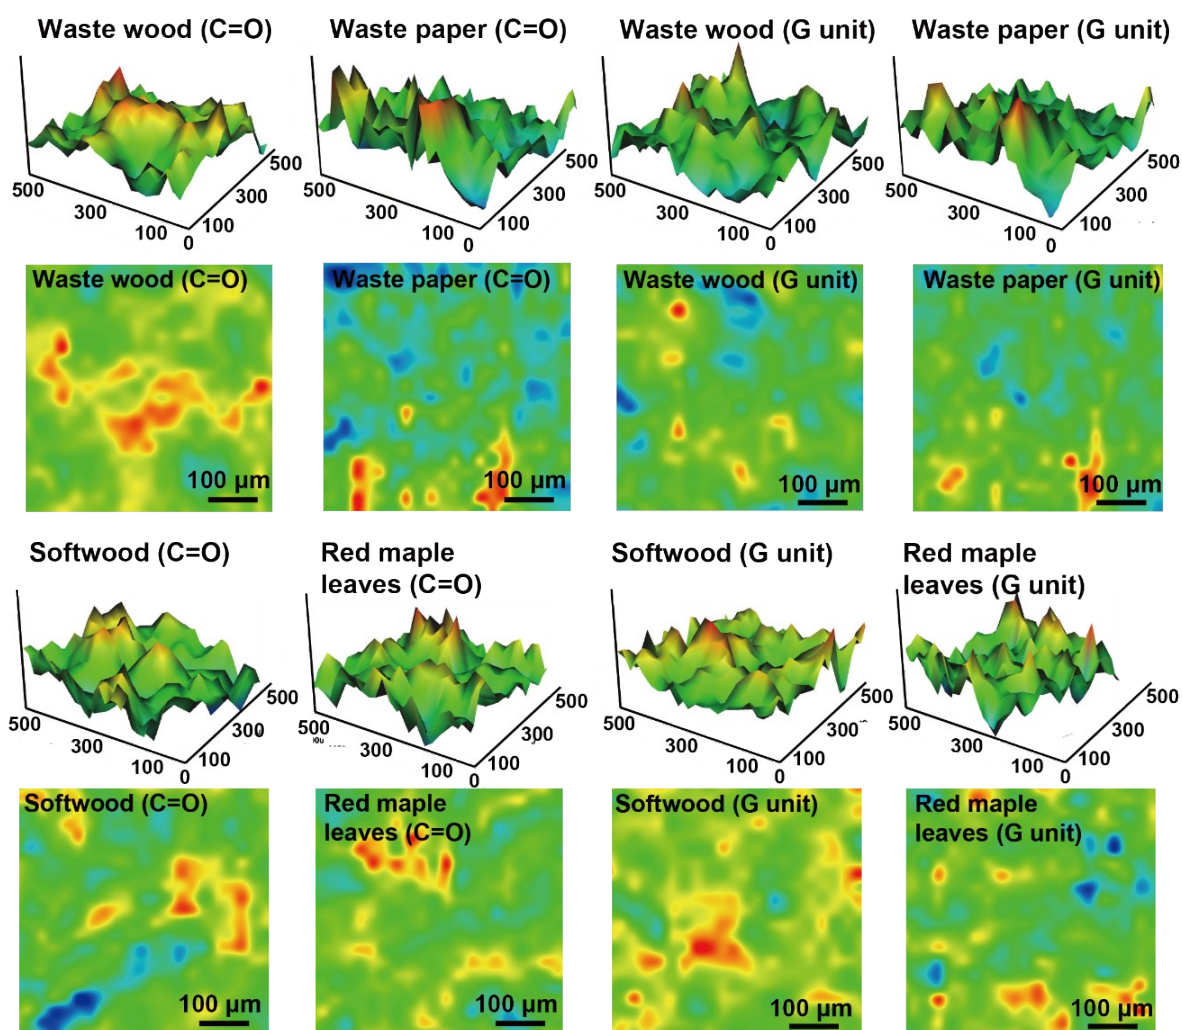

**Fig S12. FTIR spectroscopic images and corresponding intensity images** FT-IR 3D and 2D images for the C=O (1600–1700 cm<sup>-1</sup>) group and G unit (1100–1250 cm<sup>-1</sup>) of waste wood, wastepaper, softwood, and fallen red maple leaves.

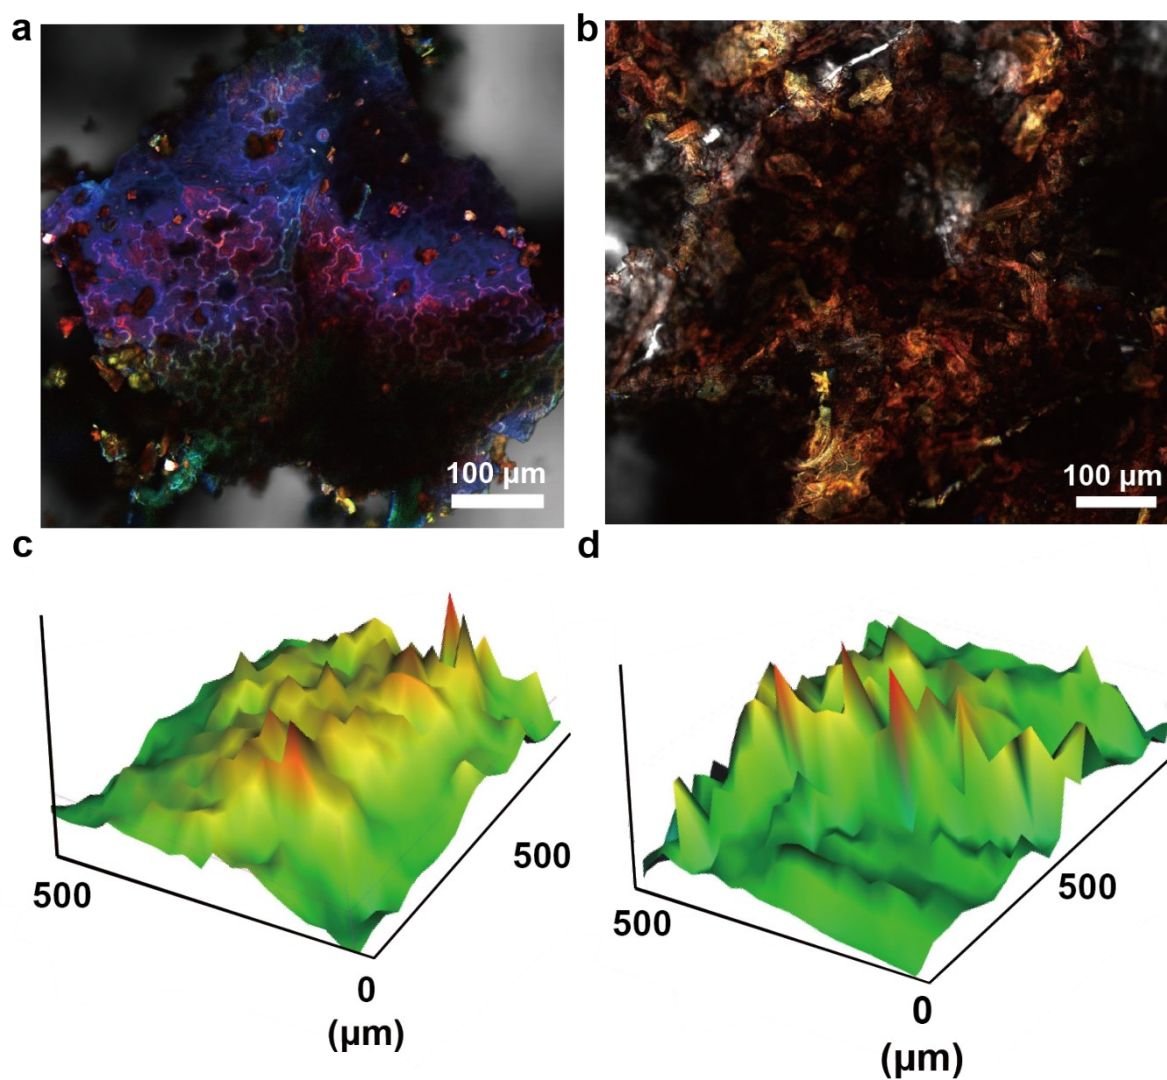

**Fig S13. Characterization of the fallen Platanus leaves before and after reassembly process.** Confocal image of the fallen Platanus leaves (a) before and (b) after reassembly process, FTIR spectroscopic images after reassembly process at (c) 1150  $\text{cm}^{-1}$  and (d) 1650  $\text{cm}^{-1}$ .

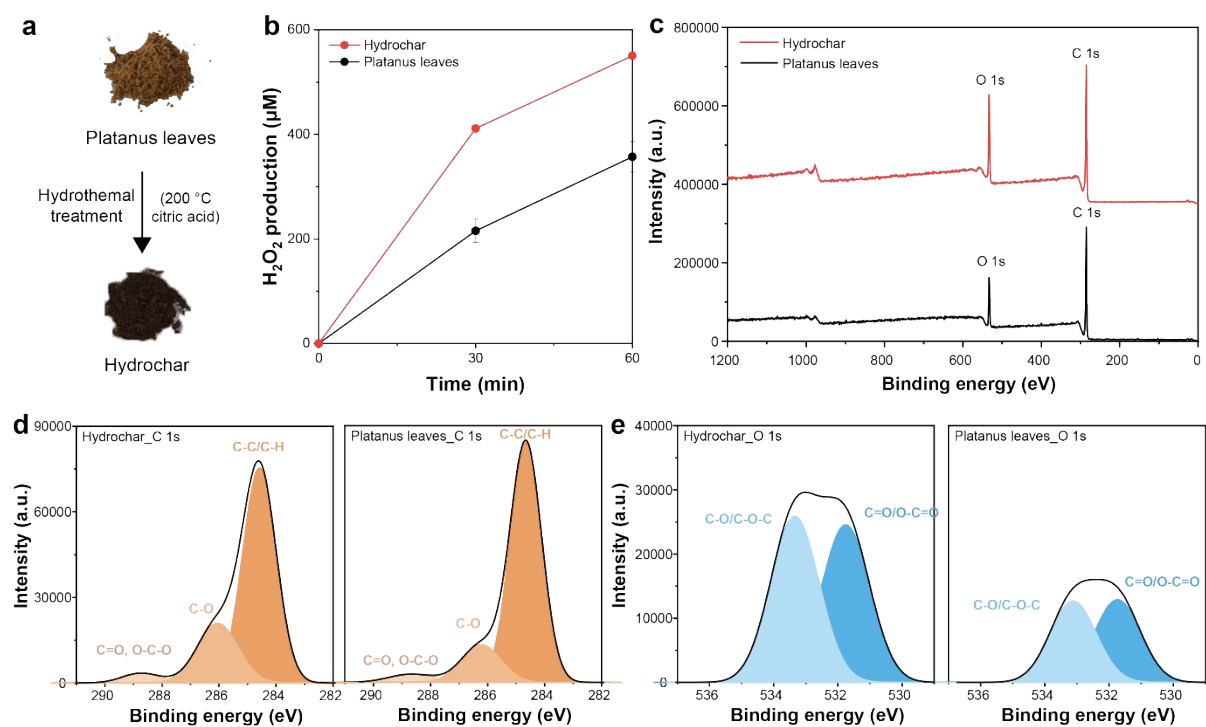

**Fig S14. Comparison of untreated Platanus leaves and hydrochar.** (a) Photographs/SEM images of the Platanus leaves and the hydrochar prepared by hydrothermal treatment with citric acid. (b) Time profiles of photocatalytic  $\text{H}_2\text{O}_2$  production for Platanus leaves and the hydrochar under  $\text{O}_2$ -purged illumination. (c) Survey scan XPS spectra, (d) C 1s spectra, and (e) O 1s spectra of Platanus leaves and hydrochar.



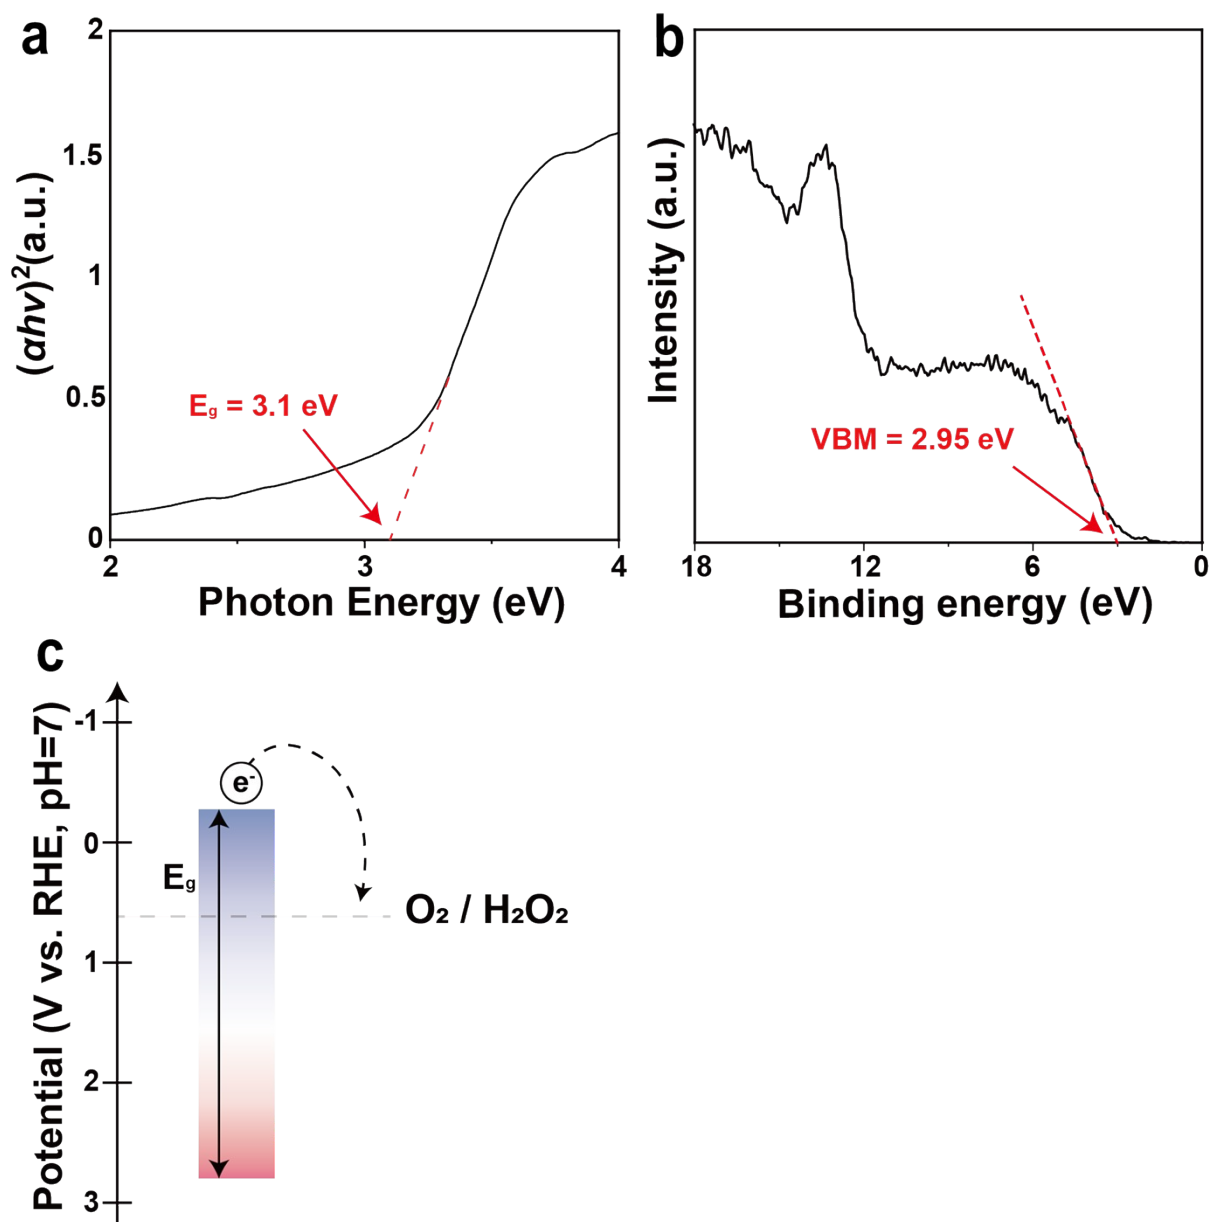

**Fig S15. Photophysical properties of the fallen *Platanus* leaves** (a) Tauc plot to estimate its optical bandgap of the fallen leaves (0.01 mg/mL). (b) XPS valence band spectra. (c) Energy diagram for the fallen *Platanus* leaves.  $E_g$ : optical bandgap.

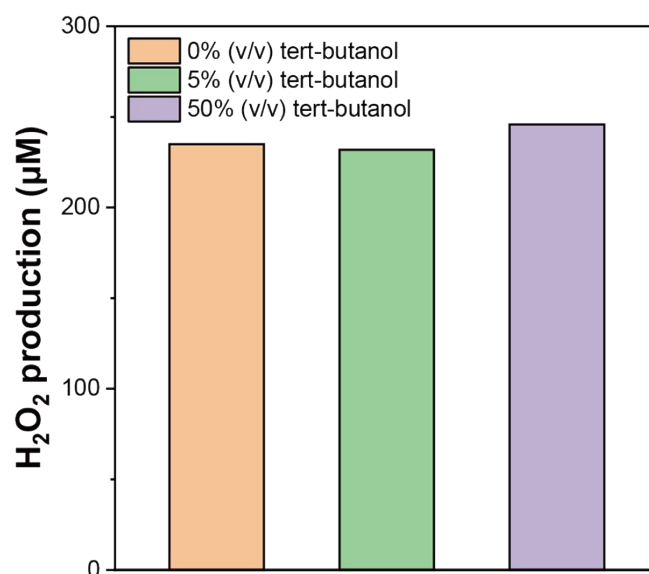

**Fig S16. Effect of hydroxyl radical scavenger on H<sub>2</sub>O<sub>2</sub> generation of *Platanus* leaves** H<sub>2</sub>O<sub>2</sub> production by *Platanus* leaves was evaluated under O<sub>2</sub>-purged conditions in 100 mM KPi buffer (pH=7) containing 0%, 5%, or 50% (v/v) tert-butanol as a hydroxyl radical scavenger to analyze the effect of hydroxyl radical scavenging on photocatalytic two-electron.

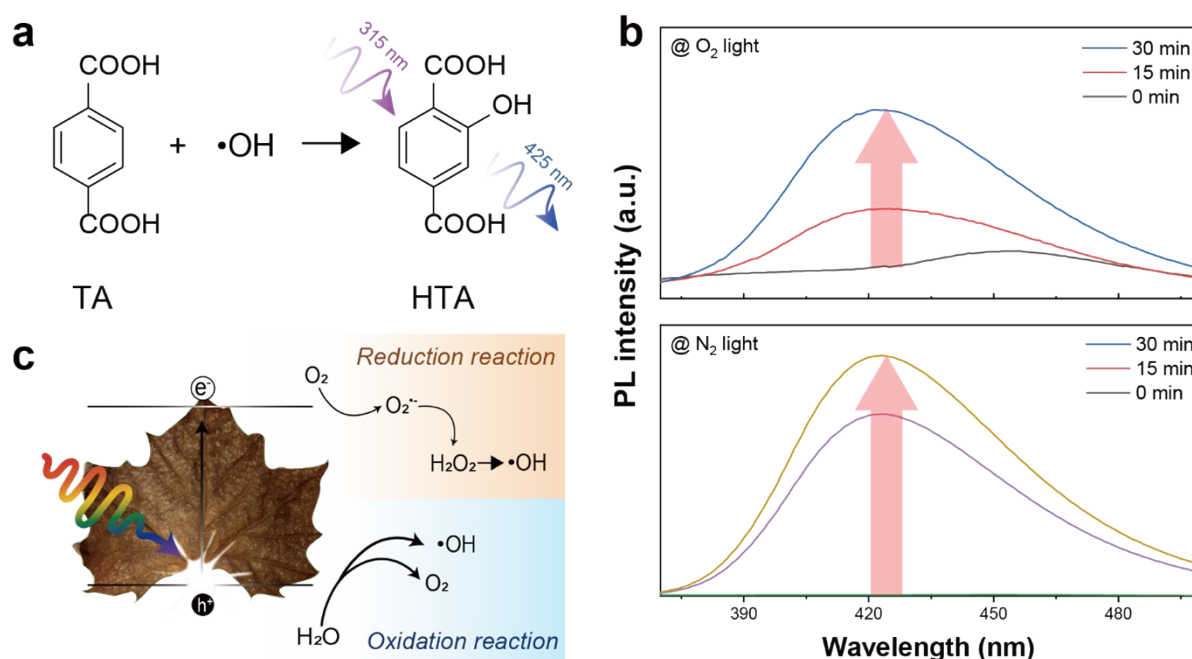

**Fig S17. Identification of hydroxyl radical formation and reaction pathways in the *Platanus*-driven photocatalytic system.** (a) Reaction scheme of terephthalic acid (TA) oxidation by hydroxyl radicals. (b) TA assay showing hydroxyl radical generation during photocatalytic reaction by *Platanus* leaves under O<sub>2</sub> light condition (upper) and N<sub>2</sub> light condition (lower). (c) Proposed reaction pathways for oxygen reduction and water oxidation under illumination.

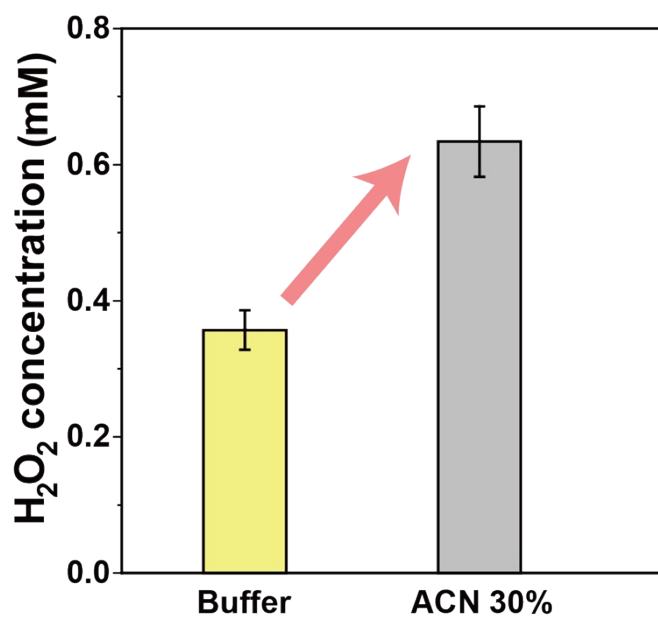

**Fig S18. Effect of cosolvent on the rate of H<sub>2</sub>O<sub>2</sub> production** The fallen Platanus leaf-driven H<sub>2</sub>O<sub>2</sub> generation in different solutions. Reaction conditions: photocatalyst (1 mg/mL) in a KPi buffer (100 mM, pH=7), 30% (w/w) acetonitrile (ACN) in the KPi buffer under light (260 nm <  $\lambda$  < 900 nm,  $I$  = 100 mW/cm<sup>2</sup>) with O<sub>2</sub> purging at room temperature after 1 h.



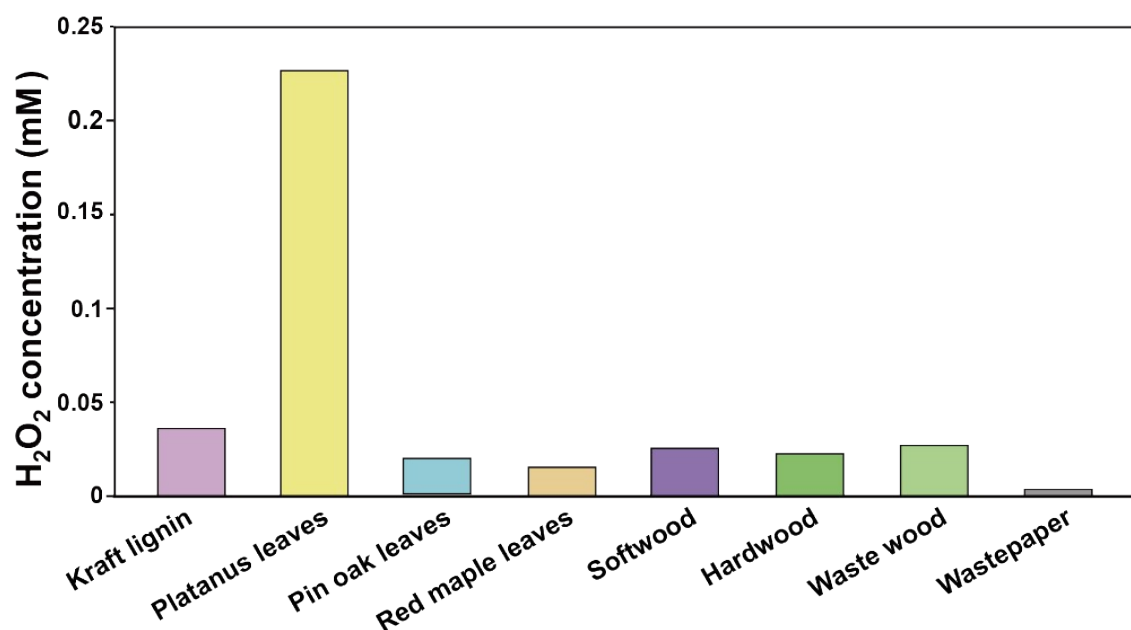

**Fig S19.** H<sub>2</sub>O<sub>2</sub> production from kraft lignin and lignocellulosic wastes (5 mg/ml) under visible light.

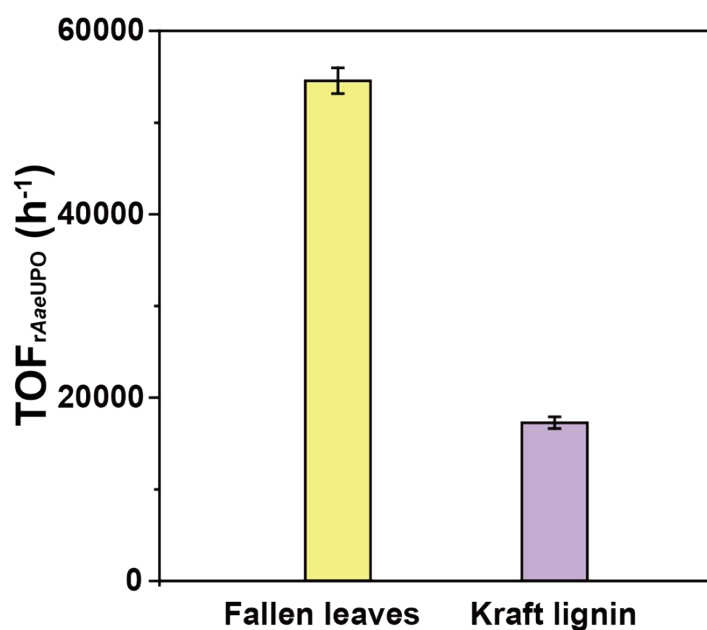

**Fig S20. Kinetics of photocatalyst/*AaeUPO* hybrid's photoenzymatic hydroxylation reaction** Photoenzymatic reaction by the fallen *Platanus* leaves and kraft lignin. Reaction conditions: photocatalyst (5 mg/mL), *AaeUPO* (10 nM), and ethylbenzene (10 mM) in a KPi buffer (100 mM, pH=7) with O<sub>2</sub> purging under visible light (400 nm < λ < 900 nm, I = 100 mW/cm<sup>2</sup>) at room temperature. The TOF<sub>AaeUPO</sub> was measured after the reaction for 30 min.

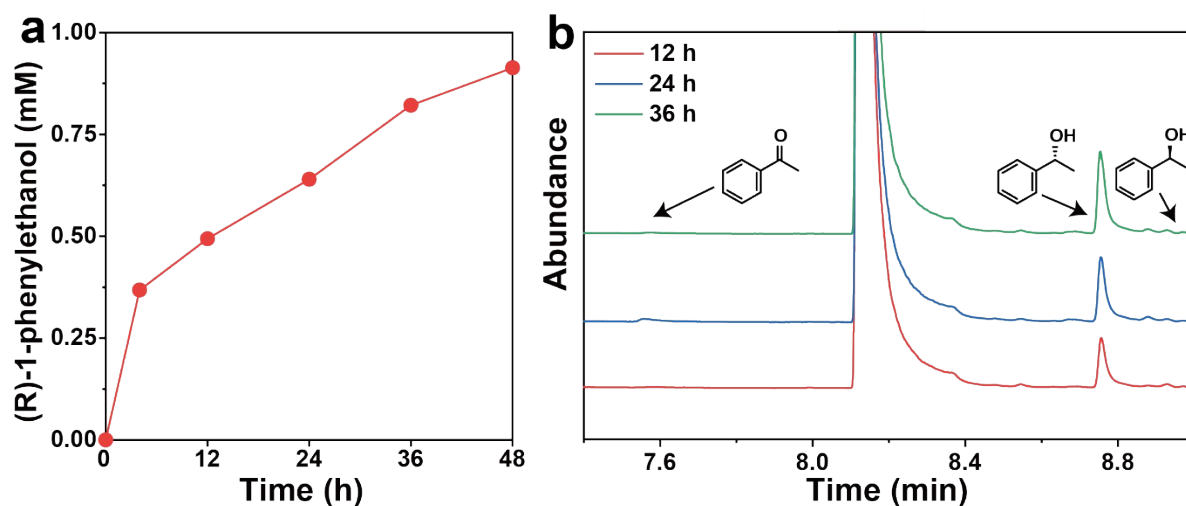

**Fig S21. Photoenzymatic systems for ethylbenzene hydroxylation** (a) Time profiles of (*R*)-1-phenylethanol from ethylbenzene hydroxylation driven by the fallen Platanus leaf/*Aae*UPO hybrid catalyst. Reaction conditions: 5 mg/mL, 10 nM *Aae*UPO, and 10 mM ethylbenzene in a KPi buffer (100 mM, pH=7) under visible light ( $400\text{ nm} < \lambda < 900\text{ nm}$ ,  $I = 100\text{ mW/cm}^2$ ) at room temperature upon  $\text{O}_2$  purging (b) The gas chromatogram during the photoenzymatic reaction of ethylbenzene

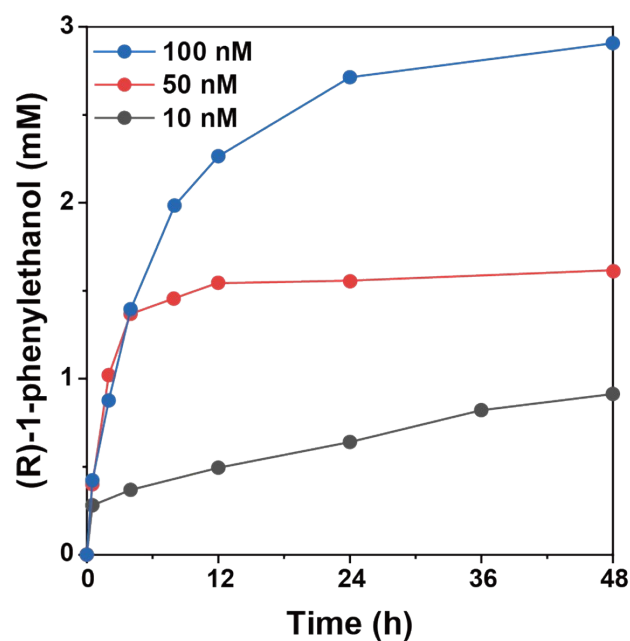

**Fig S22. Effect of enzyme loading on the concentration of (R)-1-phenylethanol production**  
Time profiles of (R)-1-phenylethanol from ethylbenzene hydroxylation driven by the fallen Platanus leaf/*Aae*UPO hybrid catalyst. Reaction conditions: 5 mg/ml, 10, 50, 100 nM *Aae*UPO, and 10 mM ethylbenzene in a KPi buffer (100 mM, pH=7) under visible light ( $400\text{ nm} < \lambda < 900\text{ nm}$ ,  $I = 100\text{ mW/cm}^2$ ) at room temperature upon  $\text{O}_2$  purging.

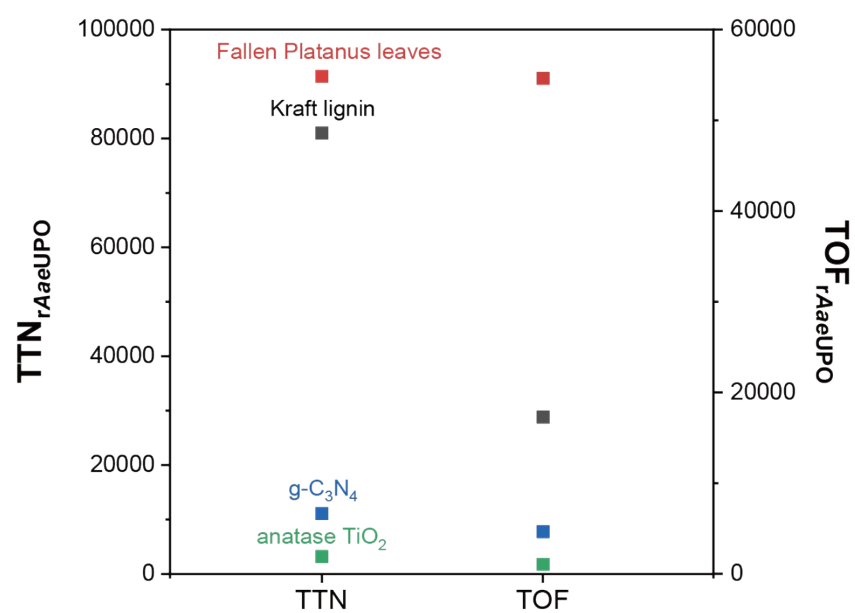

**Fig S23. Comparison of TTN<sub>AaeUPO</sub> and TOF<sub>AaeUPO</sub> values for photoenzymatic ethylbenzene hydroxylation**

**Table S1. Gas chromatography conditions for quantification of analytes**

| Substrate                                                                                                                | Temperature profile                                                                                                                  | Retention time (min)                                                                                                                                                                                                |
|--------------------------------------------------------------------------------------------------------------------------|--------------------------------------------------------------------------------------------------------------------------------------|---------------------------------------------------------------------------------------------------------------------------------------------------------------------------------------------------------------------|
| 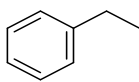<br>Ethylbenzene                        | 60 °C for 5 min<br>20 °C/min to 130 °C, hold for 6 min<br>40 °C/min to 180 °C, hold for 2 min<br>20 °C/min to 200 °C, hold for 3 min | (R)-1-phenylethanol: 8.9<br>(S)-1-phenylethanol: 9.1<br>Acetophenone: 7.6<br>1-octanol: 8.2                                                                                                                         |
| <br><i>cis</i> - $\beta$ -methylstyrene | 60 °C for 5 min<br>10 °C/min to 130 °C, hold for 5 min<br>40 °C/min to 180 °C, hold for 2 min<br>20 °C/min to 200 °C, hold for 3 min | <i>cis</i> - $\beta$ -methylstyrene: 6.3<br>(1 <i>R</i> ,2 <i>S</i> )- <i>cis</i> - $\beta$ -methylstyrene oxide: 9.1<br>(1 <i>S</i> ,2 <i>R</i> )- <i>cis</i> - $\beta$ -methylstyrene oxide 9.3<br>1-octanol: 9.7 |
| <br>Propylbenzene                      | 60 °C for 5 min<br>20 °C/min to 130 °C, hold 6 min<br>40 °C/min to 180 °C, hold for 2 min<br>20 °C/min to 200 °C, hold for 3 min     | Propylbenzene: 4.8<br>(R)-1-phenyl-1-propanol: 9.6<br>(S)-1-phenyl-1-propanol: 9.7<br>1-octanol: 8.1                                                                                                                |
| <br>Cyclohexane                       | 60 °C for 5 min<br>20 °C/min to 130 °C, hold 6 min<br>40 °C/min to 180 °C, hold for 2 min<br>20 °C/min to 200 °C, hold for 3 min     | Cyclohexanone: 5.3<br>Cyclohexanol: 7.1<br>1-octanol: 8.2                                                                                                                                                           |

**Table S2. Compositional analysis of lignocellulosic wastes**

| Sample           | Glucan     | Hemicellulose | Acid-soluble lignin | Acid-insoluble lignin | Ash       | Extractives |
|------------------|------------|---------------|---------------------|-----------------------|-----------|-------------|
| Platanus leaves  | 11.8 ± 0.3 | 4.8 ± 0.4     | 0.5 ± 0.0           | 46.1 ± 0.7            | 0.9 ± 0.1 | 12.8        |
| Red maple leaves | 9.1 ± 0.4  | 7.5 ± 0.3     | 0.5 ± 0.0           | 19.1 ± 0.8            | 3.1 ± 0.4 | 38.3        |
| Pin oak leaves   | 10.2 ± 0.2 | 8.9 ± 0.2     | 2.2 ± 0.0           | 25.7 ± 0.4            | 0.0 ± 0.0 | 30.5        |
| Waste wood       | 36.4 ± 0.5 | 12.2 ± 0.1    | 0.8 ± 0.0           | 31.5 ± 0.7            | 0.0 ± 0.0 | 5.9         |
| Softwood         | 35.2 ± 0.4 | 17.4 ± 0.3    | 0.3 ± 0.0           | 27.7 ± 0.1            | 0.0 ± 0.0 | 8.6         |
| Hardwood         | 35.2 ± 0.7 | 16.4 ± 0.3    | 0.8 ± 0.1           | 25.4 ± 0.7            | 0.0 ± 0.0 | 7.4         |
| Wastepaper       | 56.6 ± 0.5 | 14.8 ± 0.2    | 0.5 ± 0.0           | 8.3 ± 0.6             | 0.6 ± 0.1 | 5.1         |
